# Supplementary material for: Multiple moderator meta-analysis using the R-package Meta-CART
Source: PubMed Central journal article supplement (PMC7725699; doi:10.3758/s13428-020-01360-0), 2020-06-15
Supplement: 13428_2020_1360_MOESM1_ESM.pdf [file 13428_2020_1360_MOESM1_ESM.pdf]

521 **Supporting Information: residual heterogeneity in random-effects**  
522 **meta-CART**

In random-effects meta-analysis, it is assumed that there is heterogeneity unexplained by the moderators, and such heterogeneity is called residual heterogeneity. In meta-CART analysis, we estimate the residual heterogeneity using the DerSimonian and Laird (1986) method. The residual heterogeneity is computed as

$$\sigma_{\tau}^2 = \frac{\sum_{j=1}^J Q_j - \sum_{j=1}^J df_j}{\sum_{j=1}^J C_j}, \quad (11)$$

523 where  $Q_j$  is the within-subgroup  $Q$ -statistic in the  $j$ th group. It can be computed as in (4).  $df_j$  equals  
524  $K - 1$ , and the components  $C_j$  are computed as

$$C_j = \sum_{k=1}^K \frac{1}{\sigma_{\epsilon_{jk}}^2} - \frac{\sum_{k=1}^K 1/\sigma_{\epsilon_{jk}}^4}{\sum_{k=1}^K 1/\sigma_{\epsilon_{jk}}^2}. \quad (12)$$

525 In the tree growing process of RE meta-CART, the residual heterogeneity  $\sigma_{\tau}^2$  is updated after each  
526 split. Once a new split is introduced, the estimation of  $\sigma_{\tau}^2$  needs to be re-estimated based on the new  
527 values of  $Q_j$ ,  $df_j$  and  $C_j$ . As a result, the random effects within-subgroup  $Q_j^*$  needs be re-computed for  
528 all the existing terminal nodes in the current tree.
